# Supplementary material for: Integrated genomic, transcriptomic and metabolomic analysis reveals MDH2 mutation-induced metabolic disorder in recurrent focal segmental glomerulosclerosis
Source: PubMed Central journal article supplement (PMC9495259; doi:10.3389/fimmu.2022.962986), 2022-09-08
Supplement: DataSheet_1.pdf [file DataSheet_1.pdf]

A

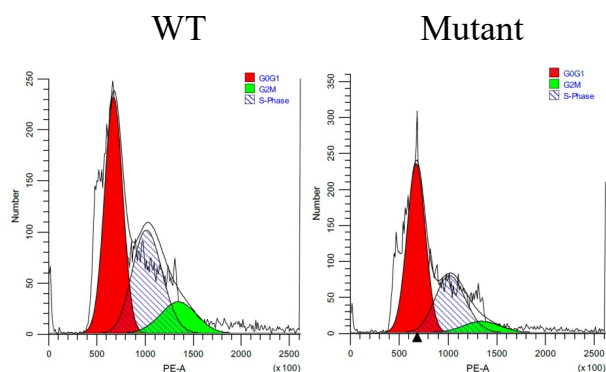

B

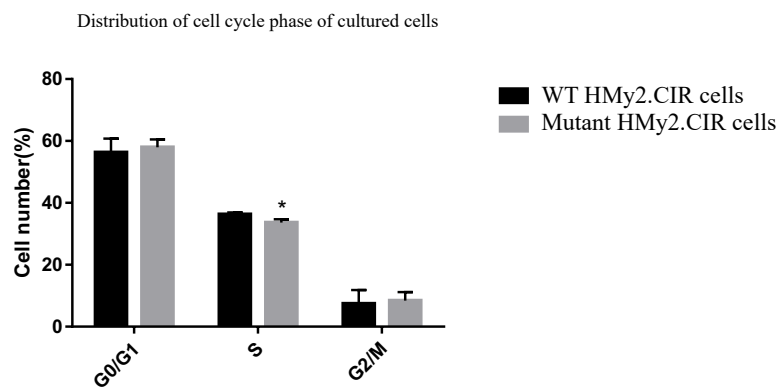

**Figure S1.** (A) Flow cytometry detects the distribution of cell cycle phase in WT HMy2.CIR or mutant HMy2.CIR cells ( $n = 3$ ). (B) Statistical results of (A). \* $p < 0.05$ ; NS, no significance.

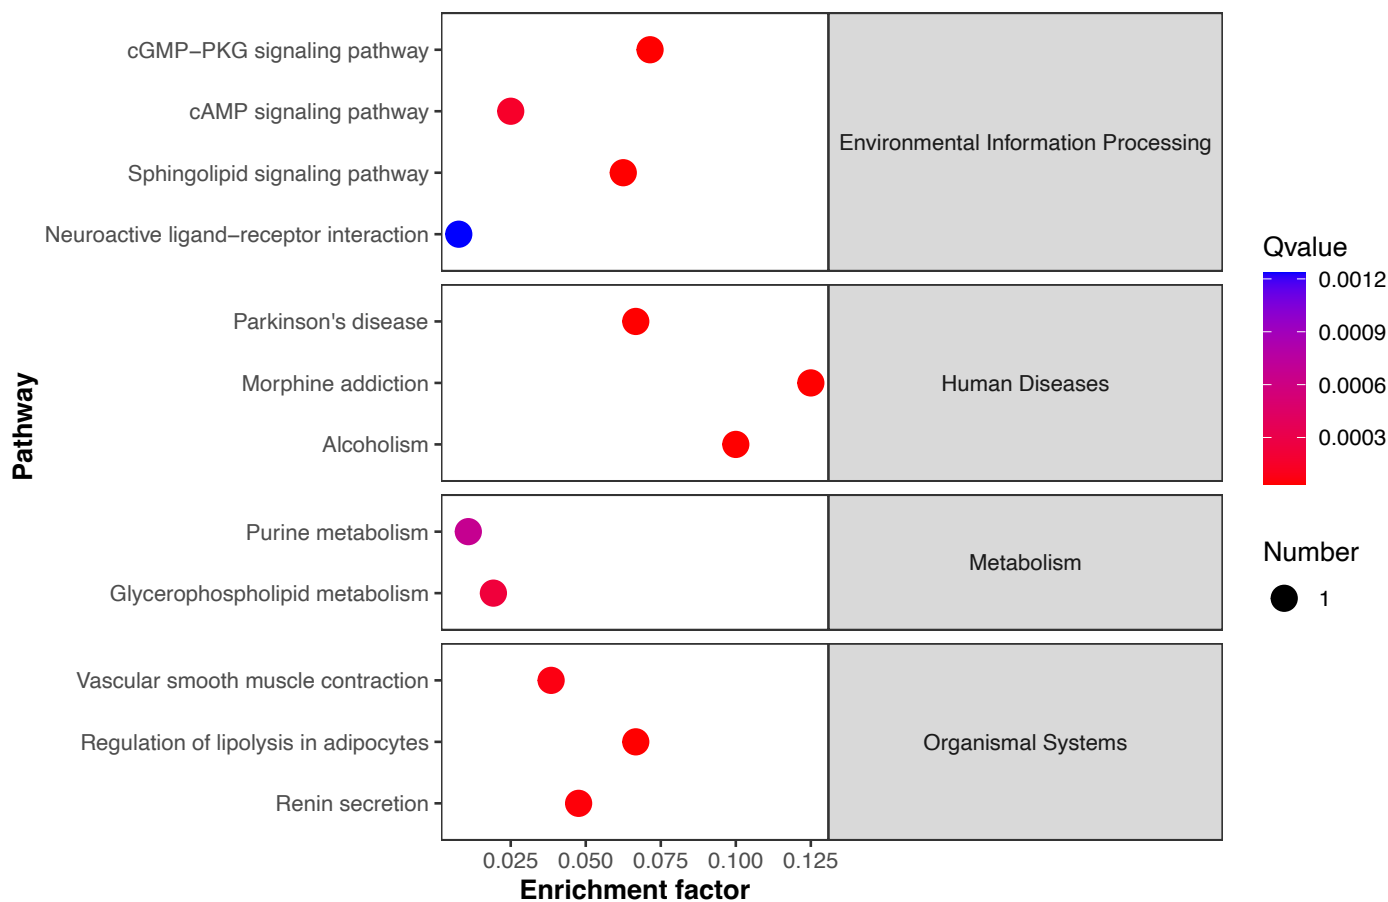

**Figure S2.** HMy2.CIR cells carrying c.26C>T mutation in MDH2 exhibited metabolic changes. Kegg enrichment results were shown as bubble chart. Enrichment factor indicates the number of differential metabolites located in the KEGG/the total number of metabolites located in the KEGG. The smaller the p value, the higher the enrichment of KEGG.

A

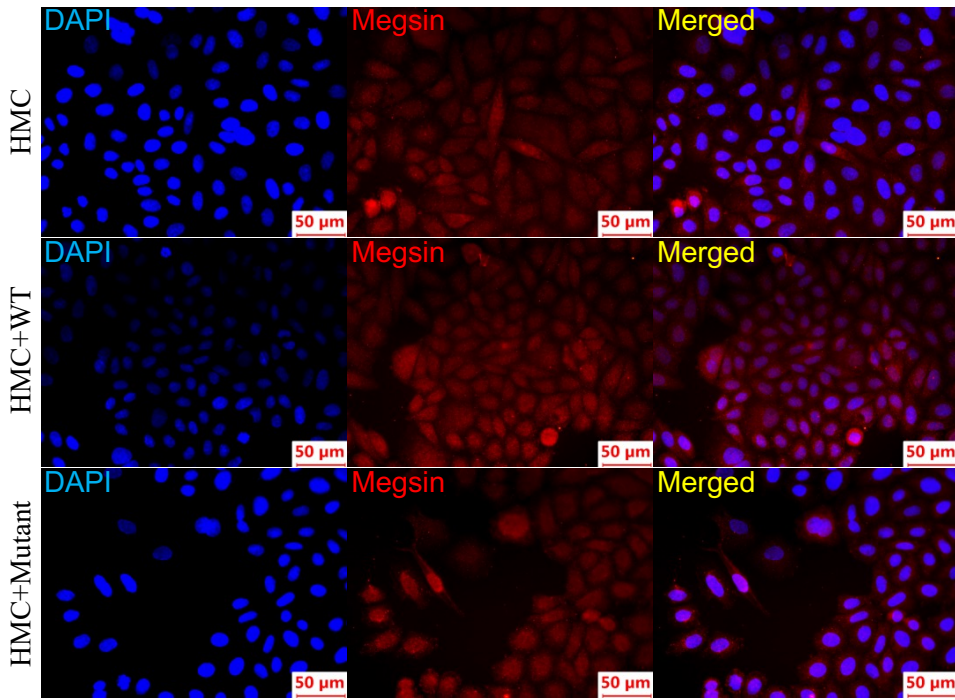

B

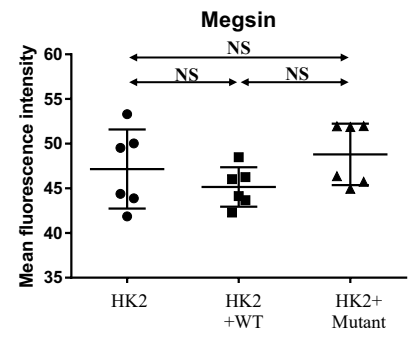

**Figure S3.** (A-B) Representative pictures and quantification of immunofluorescence staining of megsin (red) and DAPI (blue) in HMC after co-culturing with WT or mutant HMy2.CIR cells. Six random fields were taken from each coverslip (mean  $\pm$  SD, n = 6). Scale bar = 50  $\mu$ m. HMC, human mesangial cells; NS, no significance.

A

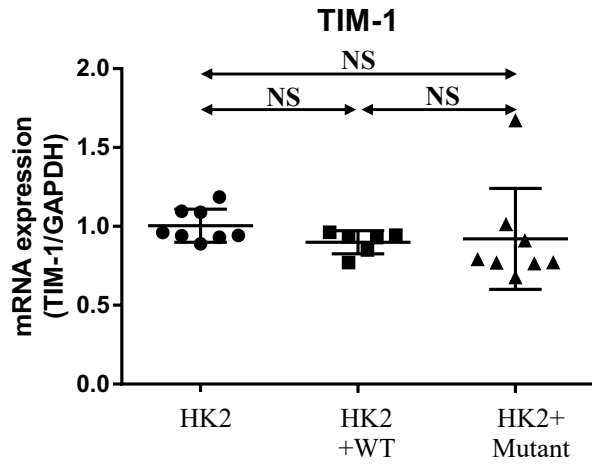

B

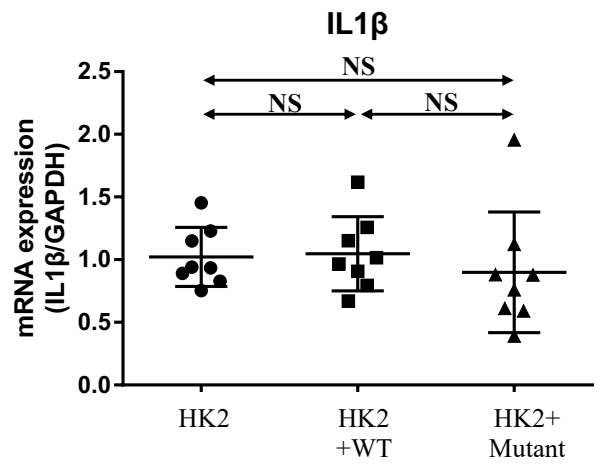

C

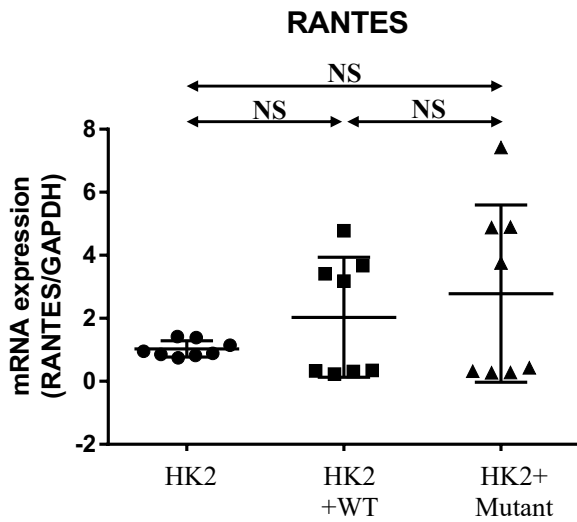

D

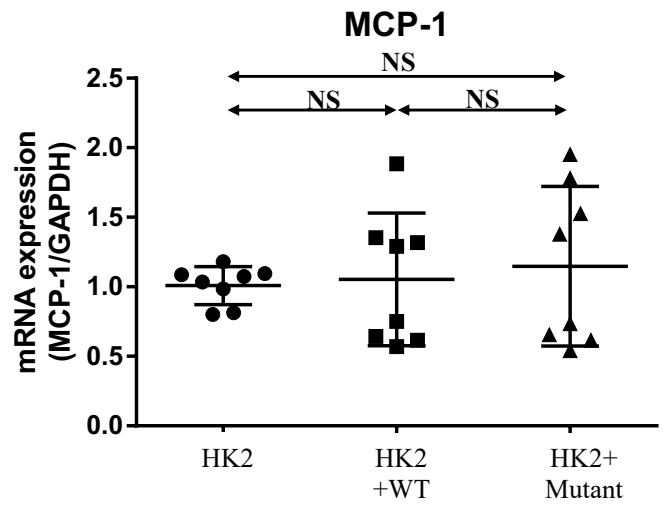

**Figure S4.** Relative mRNA expression level of (A) TIM-1, (B) IL1 $\beta$ , (C) TANTES and (D) MCP-1 in HK2 cells after co-culturing with WT or mutant HMy2.CIR cells. NS, no significance.
